# Supplementary material for: Global and Indian precipitation responses to anthropogenic aerosol and carbon dioxide forcings from PDRMIP experiments
Source: Copernicus journal article supplement (doi:10.5194/egusphere-2023-1605), 2023-08-15
Supplement: Supplementary file 1 [file egusphere-2023-1605-supplement.pdf]

**Global and Indian precipitation responses to anthropogenic aerosol and carbon dioxide forcings from PDRMIP experiments**

Sushant Das<sup>1,2\*</sup>, Frida Bender<sup>1</sup>, Thorsten Mauritsen<sup>1</sup>

<sup>1</sup>Department of Meteorology, Stockholm University  
Stockholm, Sweden

<sup>2</sup>Department of Earth and Atmospheric Sciences, National Institute of Technology Rourkela,  
Odisha, India

For submission to

**Atmospheric Chemistry and Physics (ACP)**

\*Corresponding author: [sushant.das@misu.su.se](mailto:sushant.das@misu.su.se)

Supplementary figures and captions

## Supplementary Figures

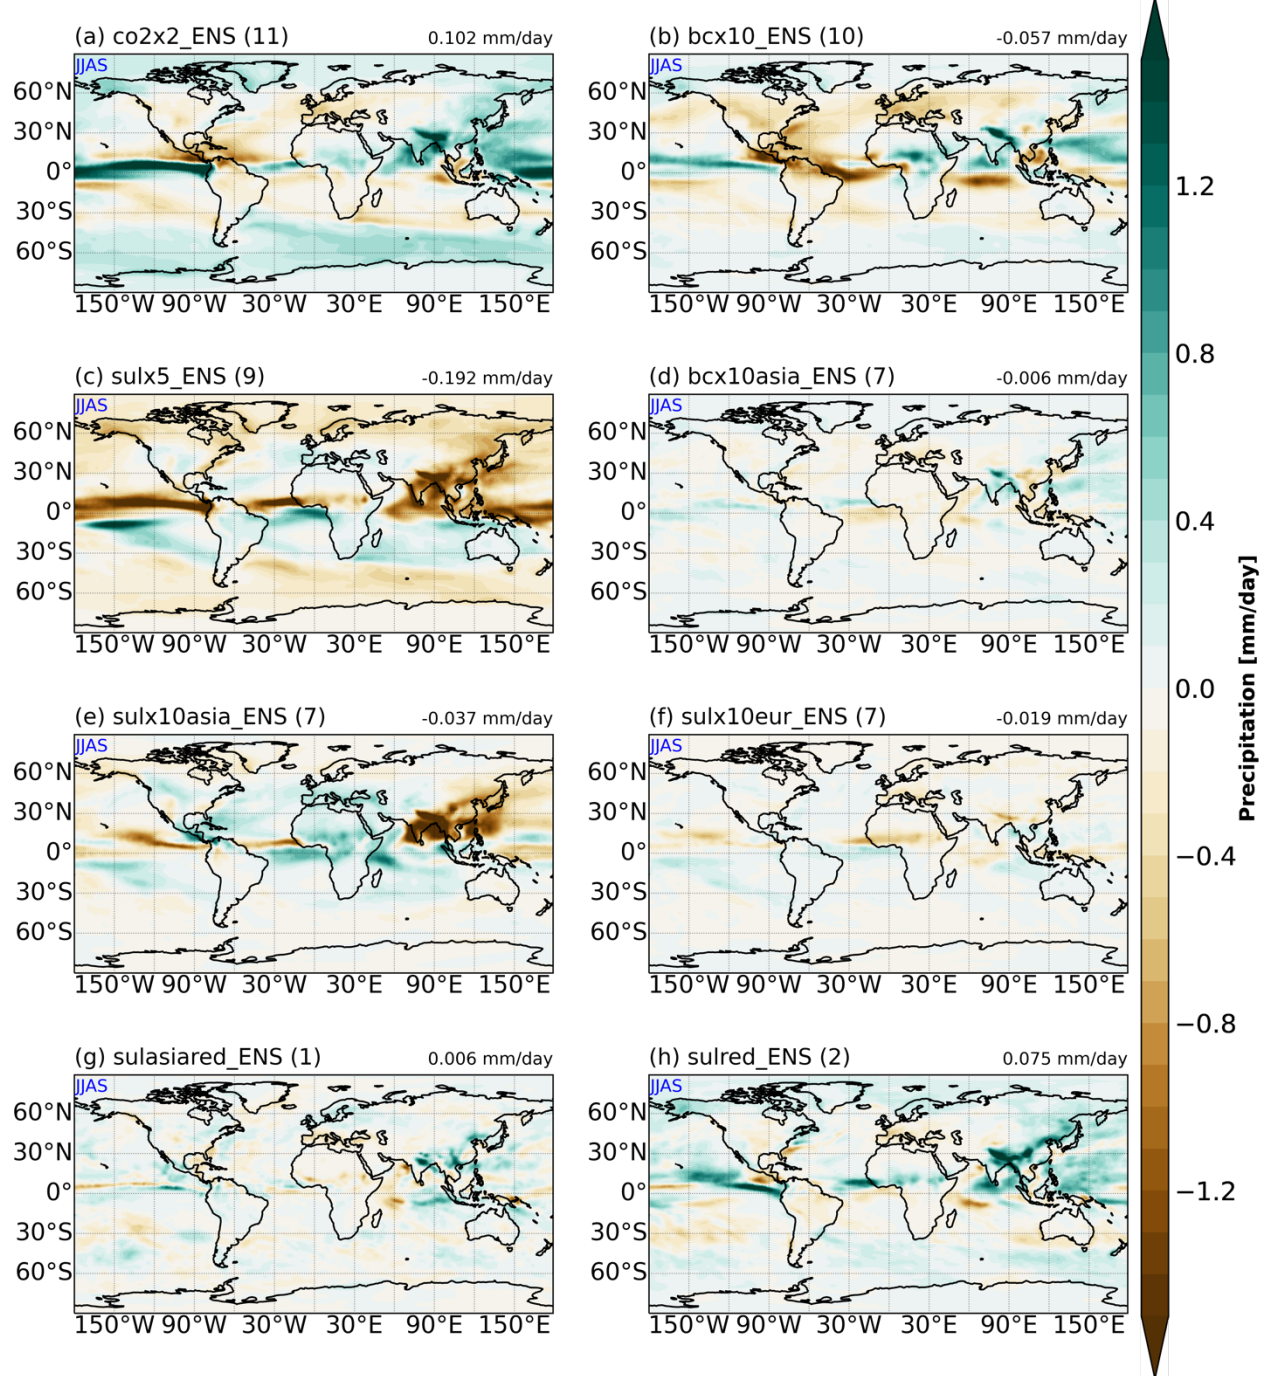

**Figure S1:** Spatial distribution of ensemble mean of total precipitation responses (mm/day) during the Indian summer monsoon (ISM) season in (a) *co2x2*, (b) *bcx10*, (c) *sulx5*, (d) *bcx10asia*, (e) *sulx10asia*, (f) *sulx10eur*, (g) *sulasiared* and (h) *sulred* with respect to their base experiments. The number in the brackets represent number of models carried out the particular perturbed experiment. The ensemble mean of change in ISM precipitation for each perturbed experiment is given on the top right corner.

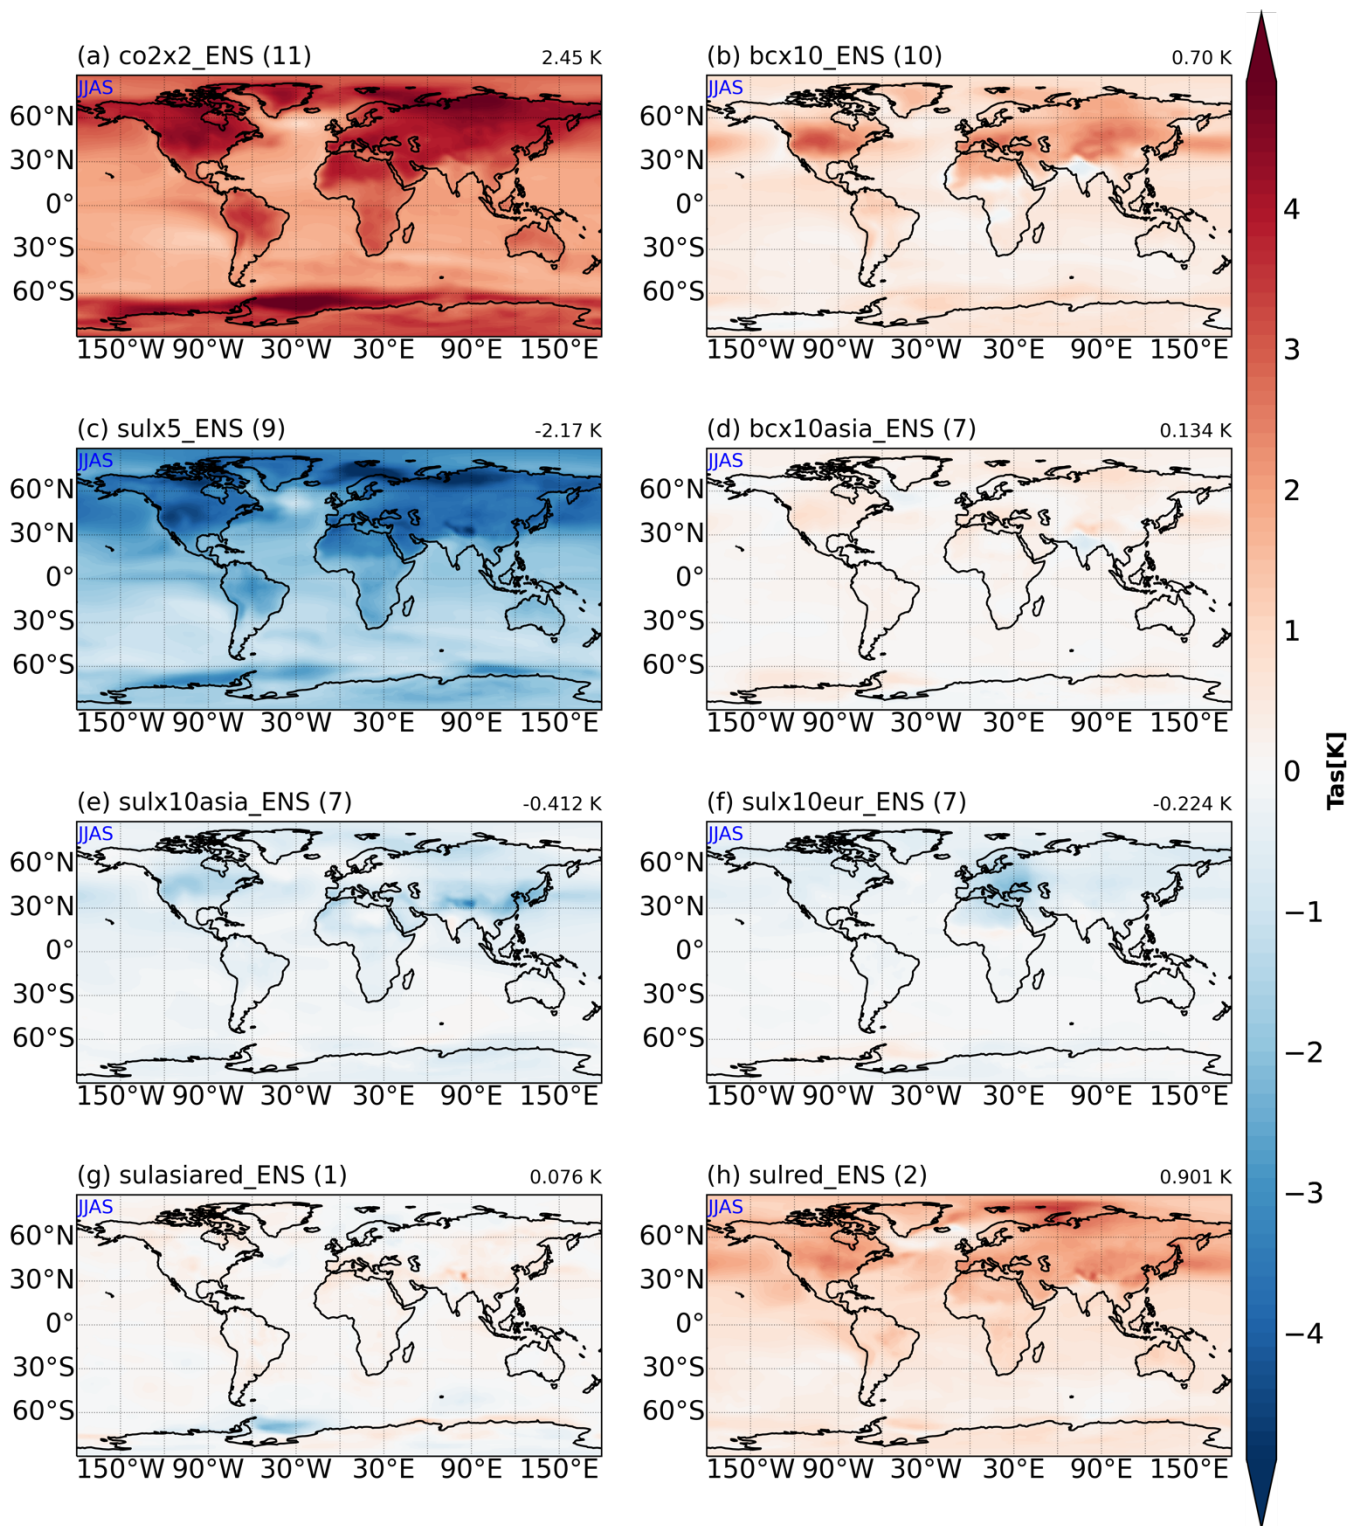

**Figure S2:** Spatial distribution of ensemble mean of changes in the near surface temperature (K) during the Indian summer monsoon (ISM) season in (a)  $co_2 \times 2$ , (b)  $bc \times 10$ , (c)  $sul \times 5$ , (d)  $bc \times 10asia$ , (e)  $sul \times 10asia$ , (f)  $sul \times 10eur$ , (g)  $sulasia_{red}$  and (h)  $sul_{red}$  with respect to their base experiments. The number in the brackets represent number of models carried out the particular perturbed experiment. The ensemble mean of change in near surface temperature during ISM for each perturbed experiment is given on the top right corner.
